# Supplementary material
Source: publisher figshare collection journal article supplement (https://acs.figshare.com/ndownloader/files/4010266)

## SUPPLEMENTARY FIGURE LEGENDS

**Figure S1** Distribution of SILAC ratios and calibration curves determine proper amount of SILAC standard for LCM samples. (A) Histograms of  $\text{Log}_2$  (peptide/protein SILAC ratio) from LCM samples spiked with 50, 100 and 400 ng of SILAC standard. Distance from the center represents a skewed ratio between sample and SILAC standard; (B) Calibration curves were constructed from median ratio of quantified peptides and proteins from triplicate LCM samples spiked with 50, 100, 200 and 400 ng of SILAC standard (blue dots with black error bars). LCM samples with 200 ng of SILAC standard resulted in  $\text{Log}_2$  (SILAC ratio) close to 0 (calculated 1:1 ratio, green dots) at both peptide and protein level, indicating approximate 1:1 ratio between tumor tissues and SILAC standard.

**Figure S2** Evaluation of LFQ and SILAC based quantification in WTL samples. (A) CVs of peptide and protein ratios quantified from quadruplicate WTL samples (only peptides quantified in  $\geq 3$  measurements were considered); (B) Number of quantified peptides and proteins from quadruplicate WTL samples. (\*\*:  $P < 0.01$ , \*\*\*\*:  $P < 0.0001$ ).

**Figure S3** Reproducibility of peptides (A) and proteins (B) quantified by shotgun global proteome profiling in replicate LCM samples ( $n=4$ ), replicate WTL samples ( $n=4$ ) and experimental LCM samples ( $n=8$ ) (obs/observation: number of times which a given peptide was quantified by LC-MS/MS).

**Figure S4** Enriched KEGG pathways between ER+ and ER- breast tumor tissues were identified from LFQ quantitative data of 8 experimental LCM samples using GSEA software. (A) Some enriched pathways share the same set of differentially expressed proteins and therefore cluster together. Two clusters were selected for further investigation, including an ER+ region (red rectangle) and an ER- (blue rectangle); (B) Enrichment plots provide detailed enrichment information of two representative KEGG pathways between ER+ and ER- breast tumor tissues from the two clusters.

**Figure S5** Comparison of different methods in quantifying proteins involved in focal adhesion pathway in quadruplicate WTL samples. (A) CVs of peptide and protein ratios quantified from replicate WTL samples ( $n=4$ ) with 3 different quantitative methods (only peptides quantified in  $\geq 3$  measurements were considered); (B) Number

of quantified peptides and proteins involved in focal adhesion pathway from quadruplicate WTL samples using 3 different quantitative methods. (\*:  $P < 0.05$ , \*\*:  $P < 0.01$ , \*\*\*\*:  $P < 0.0001$ , NS:  $P > 0.05$ ).

**Figure S6** Reproducibility of “focal adhesion” peptides (A) and proteins (B) quantified by shotgun and directed AIMS method in replicate LCM samples (n=4) and replicate WTL samples (n=4) (obs/observation: number of times which a given peptide was quantified by LC-MS/MS).

**Figure S7** An example of SILAC based SRM assay. (A) A linear calibration curve show a good correlation between observed retention time and predicted normalized retention time. This information and masses of parent and daughter ions ensure correct assignment of observed LC-MS features to their peptide sequences. The red dot is peptide “K.SPFEVYVDK.S”; (B) LC-MS feature of “light” and “heavy” versions of the peptide “K.SPFEVYVDK.S”. Baseline of this feature is not noisy, which is important to precise quantification.

Figure S1

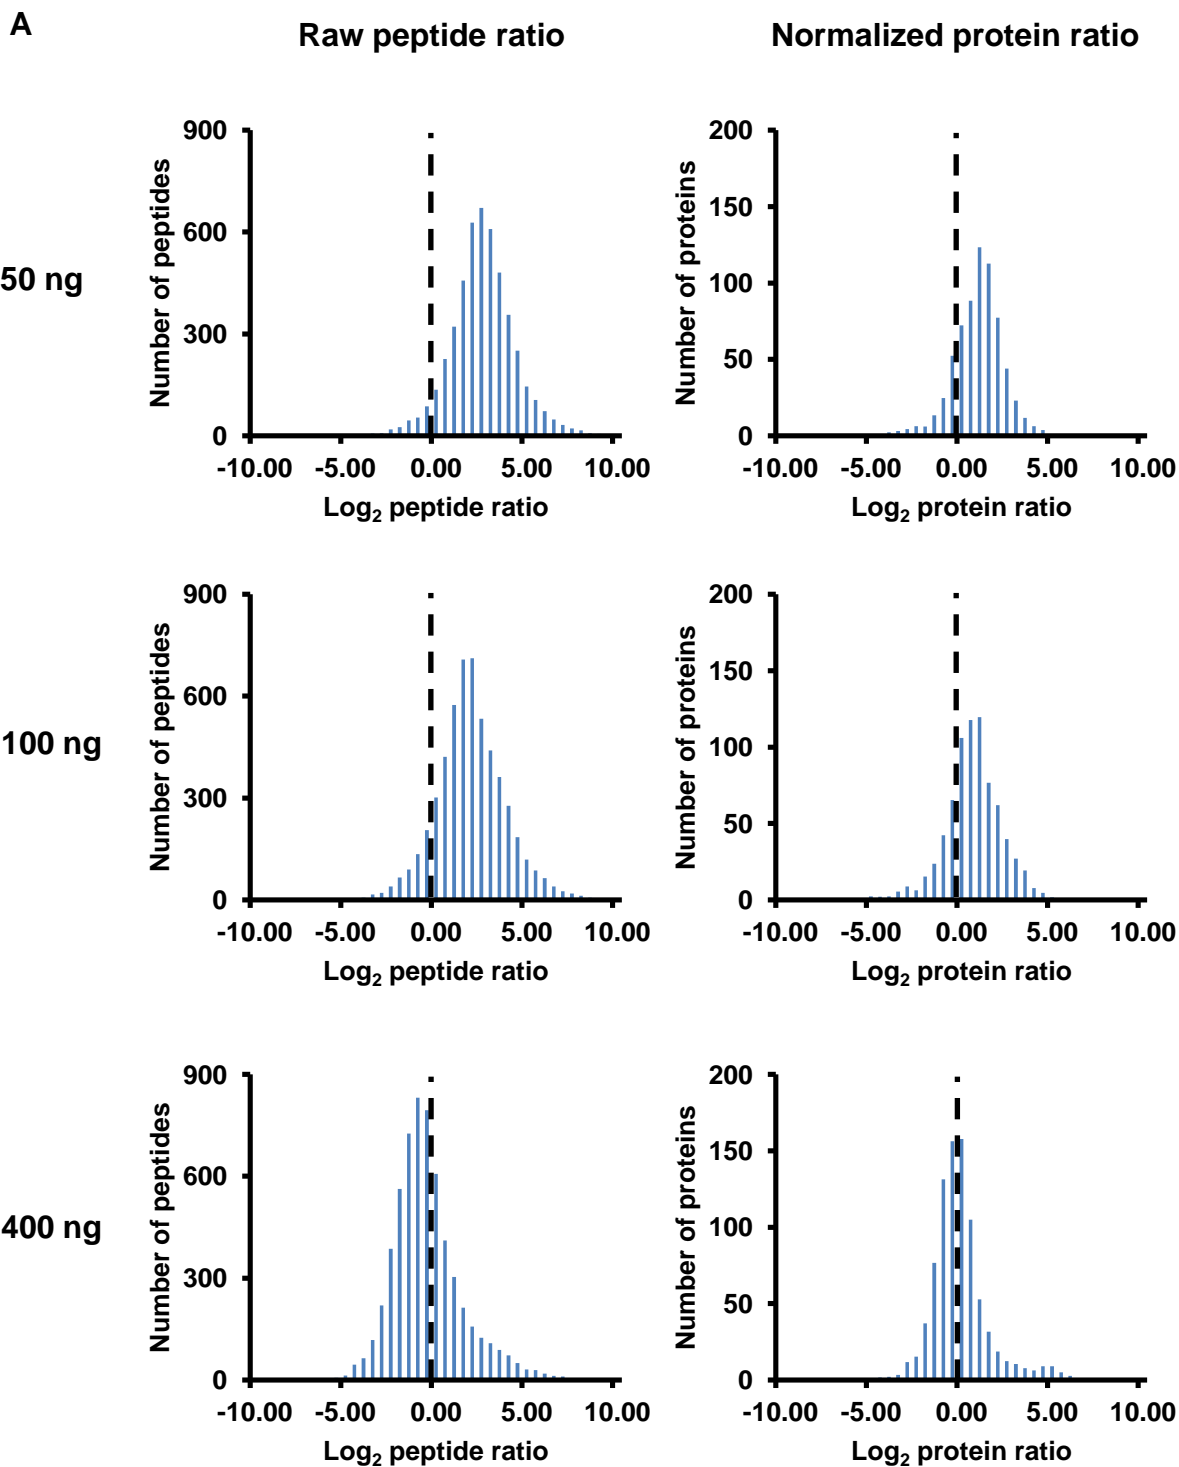

**B**

### Raw peptide ratio

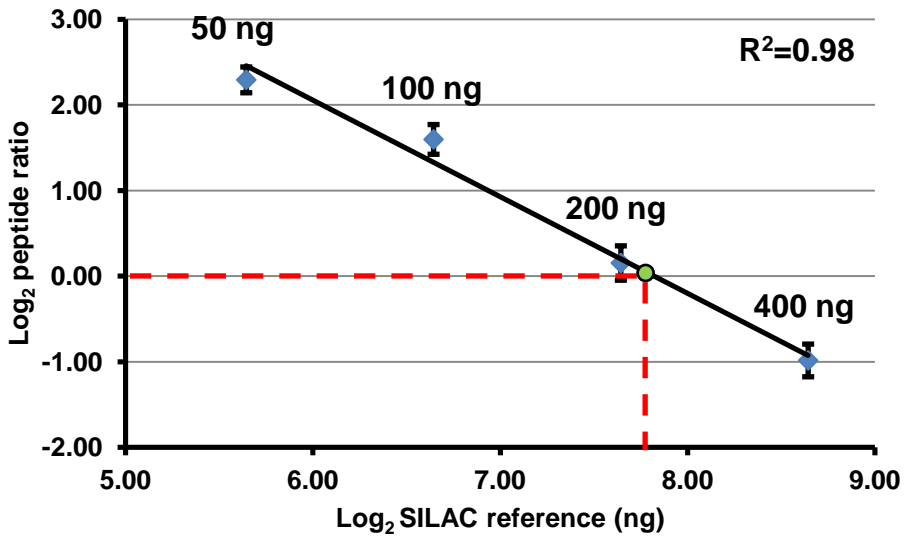

### Normalized protein ratio

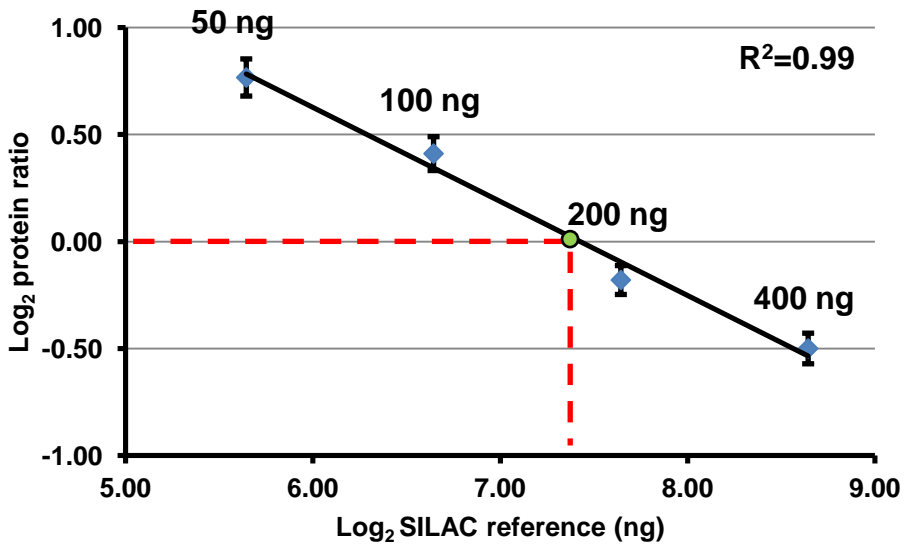

Figure S2

A

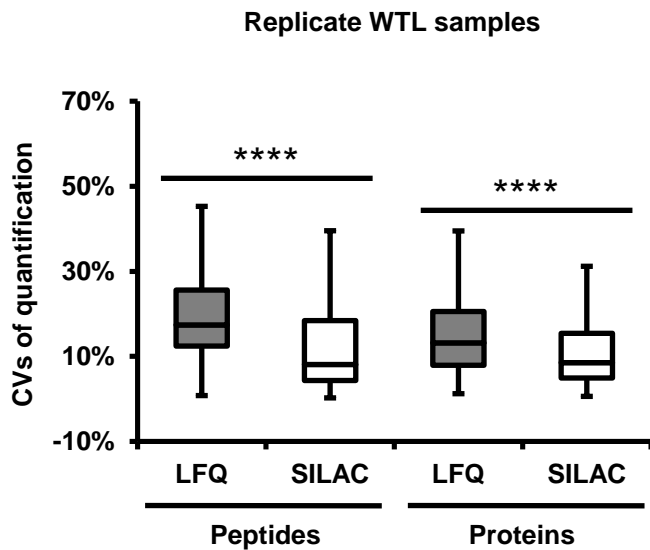

B

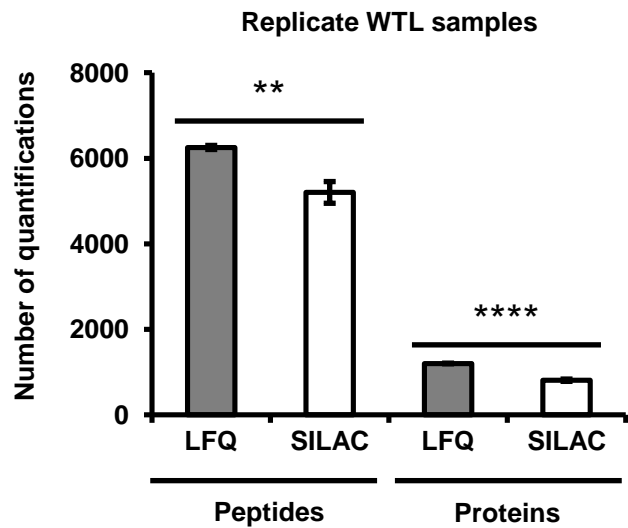

Figure S3

A

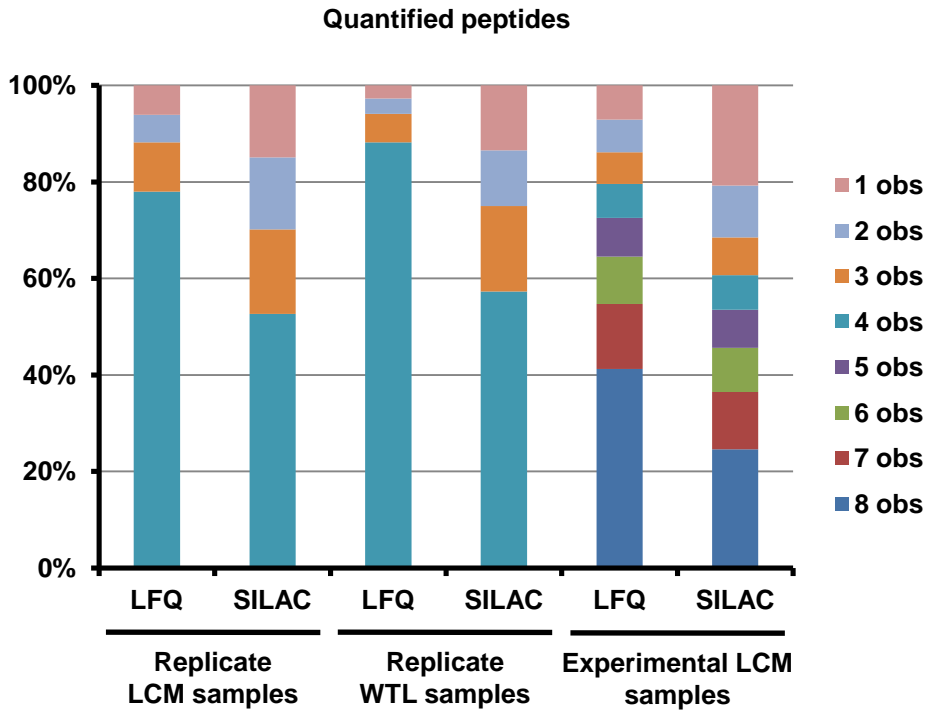

B

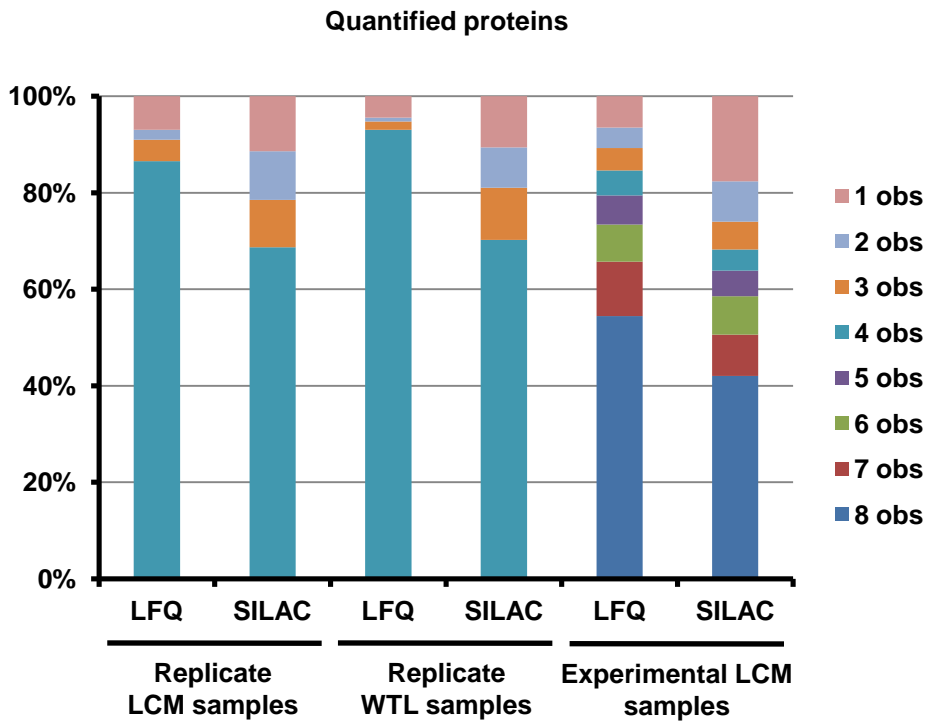

Figure S4

A

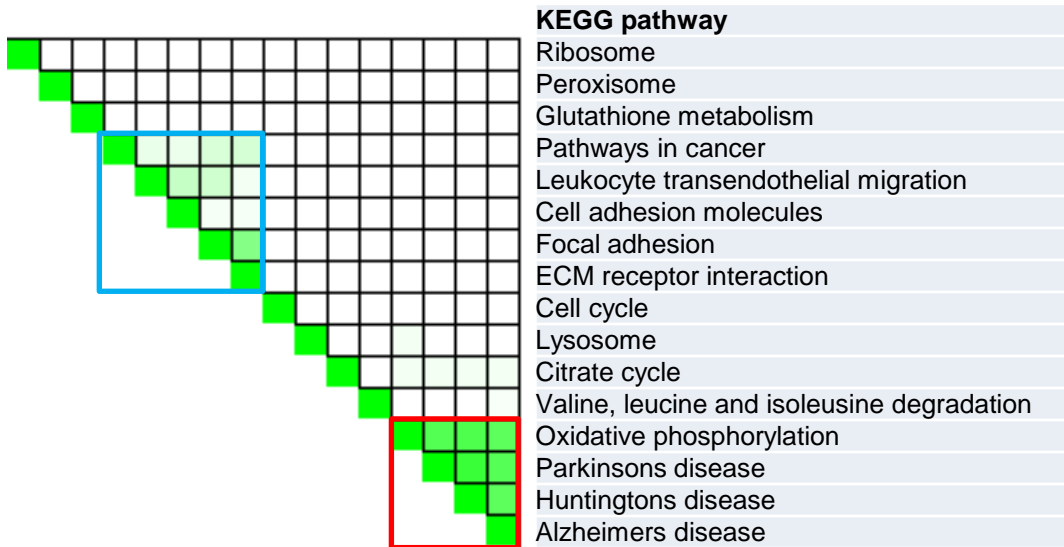

B

**Oxidative phosphorylation**

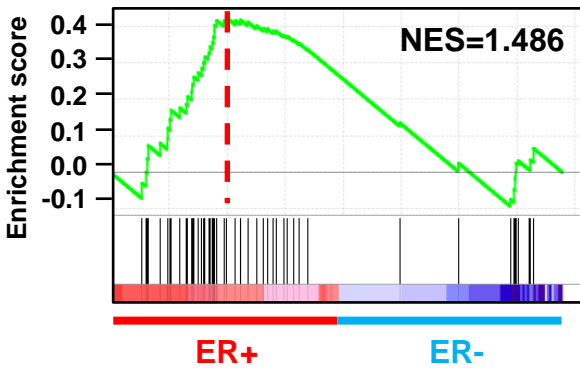

**Focal adhesion**

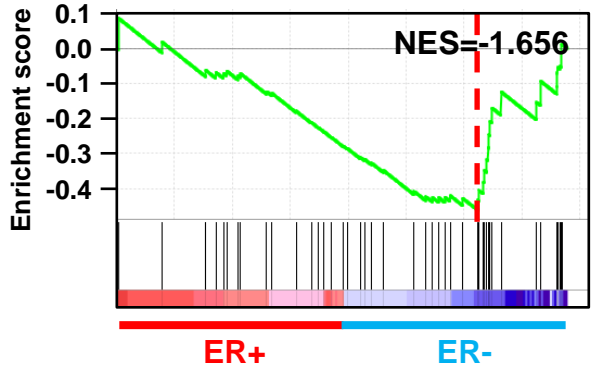

— Enrichment profile

— Protein hits

- - - Enrichment border

Figure S5

A

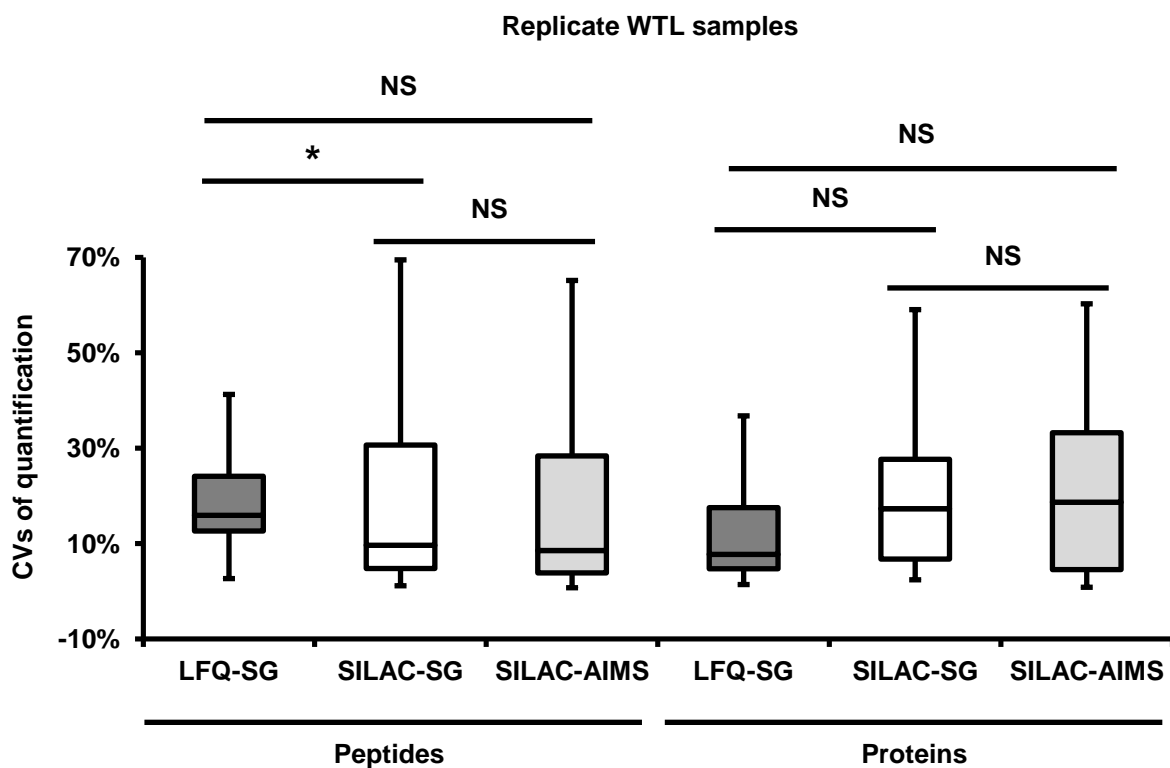

B

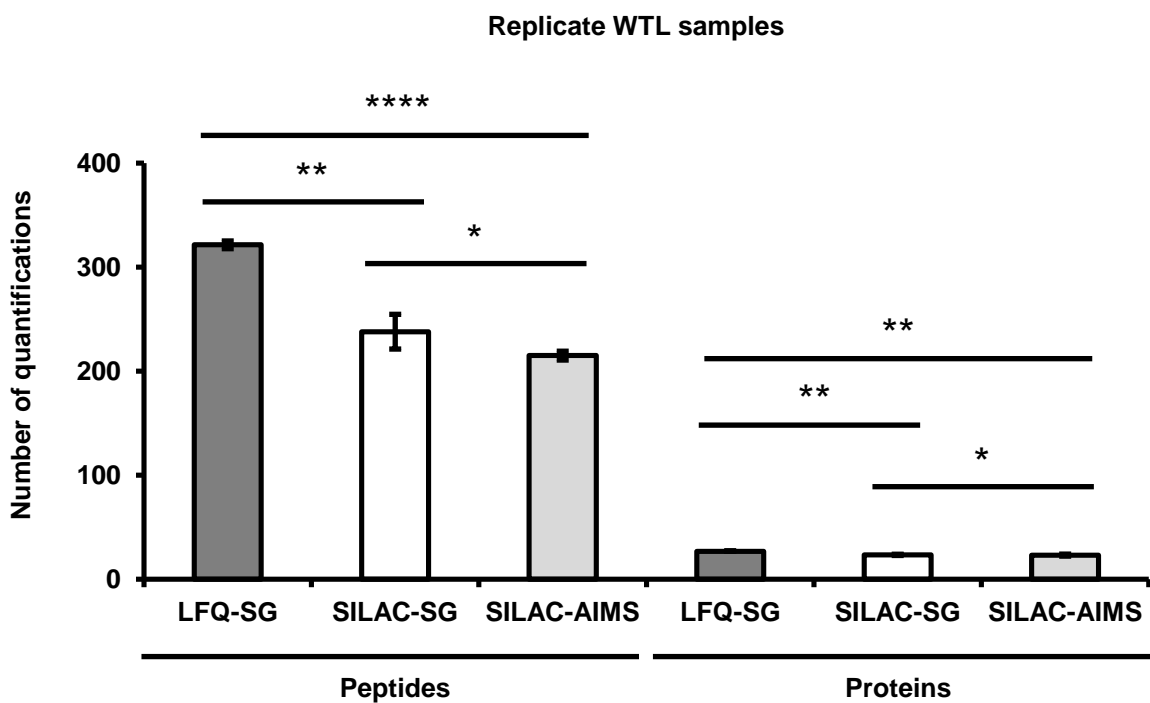



Figure S6

A

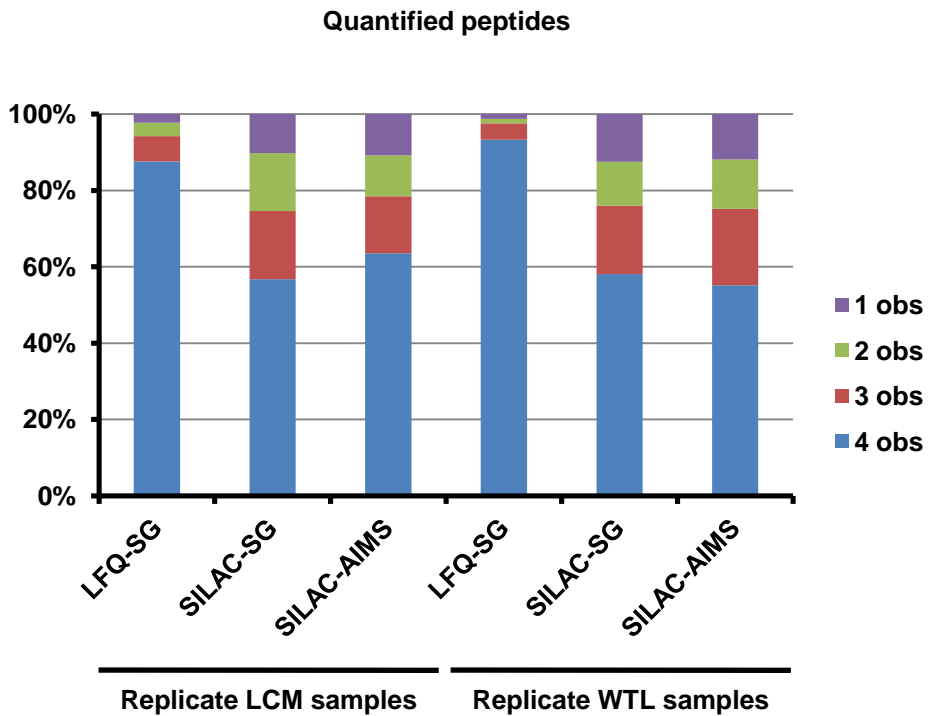

B

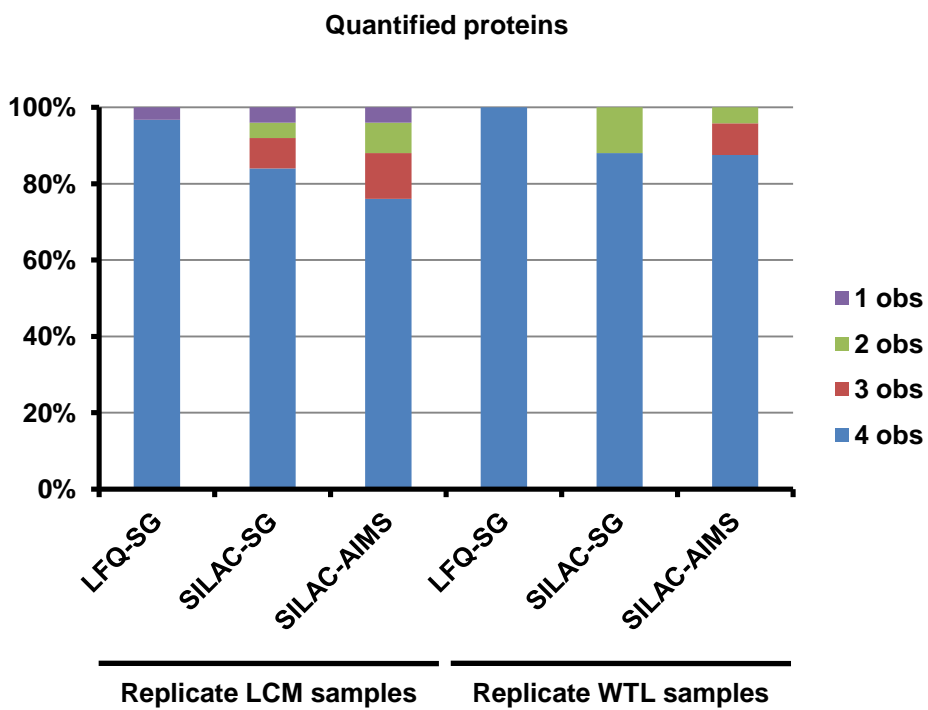

Figure S7

A

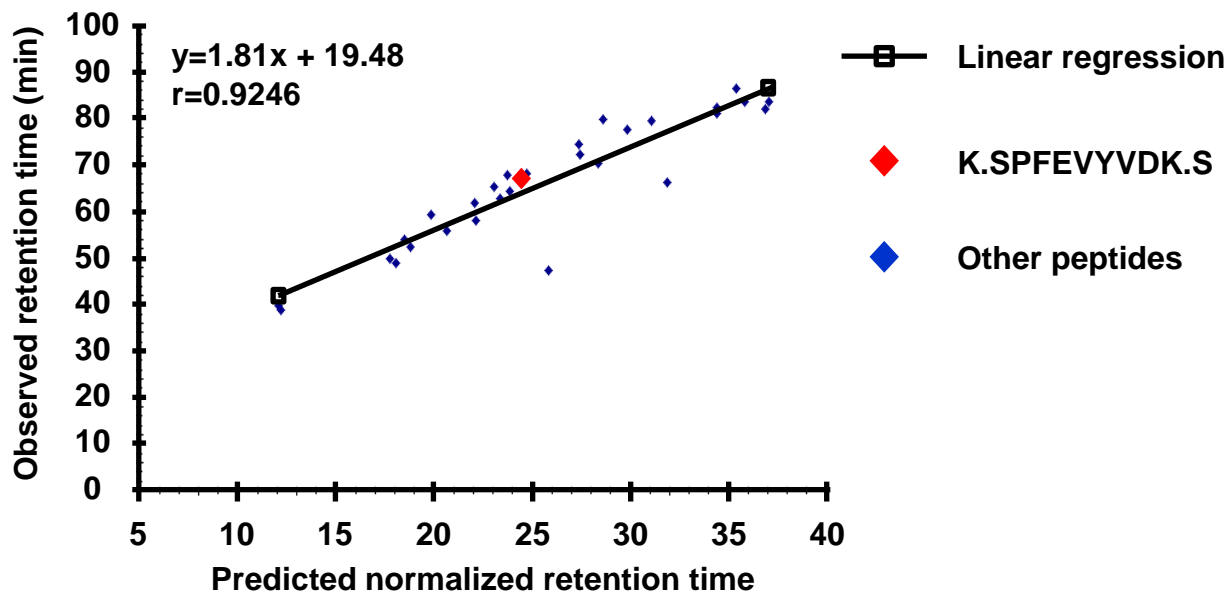

B

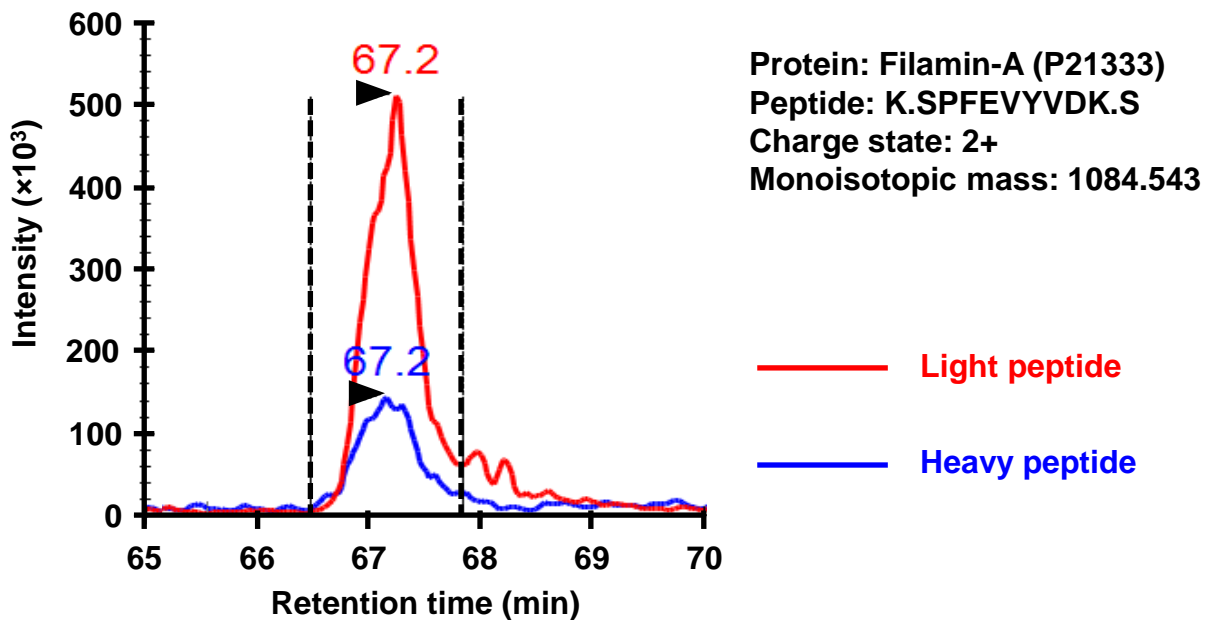

Supplement: Supplementary file 1 [file 4010266]
